# Supplementary material for: Tribological Improvement of Low-Viscosity Nanolubricants: MoO3, MoS2, WS2 and WC Nanoparticles as Additives
Source: MDPI journal article supplement (doi:10.3390/lubricants12030087), 2024-03-10
Supplement: s1 [file s1]

*Supplementary Material*

# **Tribological improvement of low-viscosity nanolubricants: MoO<sub>3</sub>, MoS<sub>2</sub>, WS<sub>2</sub> and WC nanoparticles as additives**

**José M. Liñeira del Río <sup>1,2,\*</sup>, Carlos M. C. G. Fernandes <sup>2,3</sup> and Jorge H. O. Seabra <sup>3</sup>**

<sup>1</sup> Laboratory of Thermophysical and Tribological Properties, Nafomat Group, Department of Applied Physics, Faculty of Physics, and Institute of Materials (iMATUS), Universidade de Santiago de Compostela, 15782 Santiago de Compostela, Spain

<sup>2</sup> INEGI, Universidade do Porto, Campus FEUP, Rua Dr. Roberto Frias 400, 4200-465 Porto, Portugal; cfernandes@fe.up.pt

<sup>3</sup> Faculdade de Engenharia, Universidade do Porto, Rua Dr. Roberto Frias s/n, 4200-465 Porto, Portugal; jseabra@inegi.up.pt

**Table S1.** Viscosity,  $\eta/\text{mPa}\cdot\text{s}$ , of the PAO4 and MoS<sub>2</sub> lubricants as a function of temperature at 0.1 MPa obtained with the Anton Paar Stabinger SVM 3000.

| $T/\text{K}$                                       | $\eta/\text{mPa}\cdot\text{s}$ | $T/\text{K}$ | $\eta/\text{mPa}\cdot\text{s}$ | $T/\text{K}$ | $\eta/\text{mPa}\cdot\text{s}$ |
|----------------------------------------------------|--------------------------------|--------------|--------------------------------|--------------|--------------------------------|
| <i>PAO4</i>                                        |                                |              |                                |              |                                |
| 278.15                                             | 67.276                         | 313.15       | 14.248                         | 348.15       | 5.1304                         |
| 283.15                                             | 51.492                         | 318.15       | 12.003                         | 353.15       | 4.5652                         |
| 288.15                                             | 40.11                          | 323.15       | 10.209                         | 358.15       | 4.088                          |
| 293.15                                             | 31.729                         | 328.15       | 8.7613                         | 363.15       | 3.6848                         |
| 298.15                                             | 25.679                         | 333.15       | 7.5819                         | 368.15       | 3.3415                         |
| 303.15                                             | 20.75                          | 338.15       | 6.611                          | 373.15       | 3.0485                         |
| 308.15                                             | 17.092                         | 343.15       | 5.8036                         |              |                                |
| <i>99.90 wt % PAO4 + 0.10 wt % MoS<sub>2</sub></i> |                                |              |                                |              |                                |
| 278.15                                             | 67.721                         | 313.15       | 14.293                         | 348.15       | 5.1161                         |
| 283.15                                             | 51.741                         | 318.15       | 12.039                         | 353.15       | 4.5459                         |
| 288.15                                             | 40.274                         | 323.15       | 10.237                         | 358.15       | 4.0528                         |
| 293.15                                             | 31.851                         | 328.15       | 8.7844                         | 363.15       | 3.6396                         |
| 298.15                                             | 25.778                         | 333.15       | 7.5926                         | 368.15       | 3.2834                         |
| 303.15                                             | 20.811                         | 338.15       | 6.6083                         | 373.15       | 2.9949                         |
| 308.15                                             | 17.147                         | 343.15       | 5.7955                         |              |                                |
| <i>99.00 wt % PAO4 + 1.00 wt % MoS<sub>2</sub></i> |                                |              |                                |              |                                |
| 278.15                                             | 68.156                         | 313.15       | 14.364                         | 348.15       | 5.1528                         |
| 283.15                                             | 52.054                         | 318.15       | 12.098                         | 353.15       | 4.5787                         |
| 288.15                                             | 40.505                         | 323.15       | 10.288                         | 358.15       | 4.0976                         |
| 293.15                                             | 32.032                         | 328.15       | 8.8269                         | 363.15       | 3.6921                         |
| 298.15                                             | 25.913                         | 333.15       | 7.635                          | 368.15       | 3.3187                         |
| 303.15                                             | 20.913                         | 338.15       | 6.6505                         | 373.15       | 3.0138                         |
| 308.15                                             | 17.231                         | 343.15       | 5.8346                         |              |                                |
